# Supplementary material for: The Impact of the COVID-19 Lockdown on Weight Loss and Body Composition in Subjects with Overweight and Obesity Participating in a Nationwide Weight-Loss Program: Impact of a Remote Consultation Follow-Up—The CO-RNPC Study
Source: MDPI journal article supplement (doi:10.3390/nu13072152), 2021-06-23
Supplement: s1 [file s1]

**eTable 1: Description of changes in body composition and rate of change before, during and after COVID19 lockdown periods**

|                          | Period          | Initial value (cm or %) | Final value (cm or %) | Delta (cm or %)   | Pvalue* |
|--------------------------|-----------------|-------------------------|-----------------------|-------------------|---------|
| Waist circumference (cm) | Before Lockdown | 102.0 [93.0 ; 112.0]    | 101.0 [92.0 ; 111.0]  | -1 [-2 ; 0]       | <.01    |
|                          | Lockdown        | 101.0 [92.0 ; 111.0]    | 98.0 [90.0 ; 107.0]   | -2 [-6 ; 0]       | <.01    |
|                          | After lockdown  | 98.0 [90.0 ; 107.0]     | 98.0 [89.0 ; 107.0]   | 0 [-1 ; 0]        | <.01    |
| Fat mass (%)             | Before Lockdown | 40.6 [37.0 ; 44.4]      | 40.2 [36.6 ; 44.0]    | -0.4 [-0.7 ; 0]   | <.01    |
|                          | Lockdown        | 40.2 [36.6 ; 44.0]      | 39.1 [35.5 ; 43.2]    | -0.9 [-2.3 ; 0.2] | <.01    |
|                          | After lockdown  | 39.1 [35.5 ; 43.2]      | 38.9 [35.2 ; 42.9]    | -0.2 [-0.5 ; 0.1] | <.01    |
| Muscle mass (%)          | Before Lockdown | 29.6 [27.5 ; 33.0]      | 29.7 [27.6 ; 33.1]    | 0.1 [0 ; 0.2]     | <.01    |
|                          | Lockdown        | 29.7 [27.6 ; 33.1]      | 30.0 [27.8 ; 33.7]    | 0.2 [-0.1 ; 0.7]  | <.01    |
|                          | After lockdown  | 30.0 [27.8 ; 33.7]      | 30.1 [27.9 ; 33.8]    | 0 [-0.1 ; 0.2]    | <.01    |
| Body water (%)           | Before Lockdown | 43.1 [40.4 ; 45.8]      | 43.5 [40.7 ; 46.3]    | 0.2 [0 ; 0.5]     | <.01    |
|                          | Lockdown        | 43.5 [40.7 ; 46.3]      | 44.2 [41.3 ; 46.9]    | 0.6 [-0.2 ; 1.6]  | <.01    |
|                          | After lockdown  | 44.2 [41.3 ; 46.9]      | 44.4 [41.4 ; 47.1]    | 0.1 [-0.1 ; 0.4]  | <.01    |

Median period durations between two measures: before lockdown: 15 days [15; 17], during LD: 99 days [92; 106], after LD: 15 days [15; 21]. Values are presented in median and interquartile range

\*All p values were results of paired t-test comparing initial and final weights

**eTable 2: Description of changes in body composition and rate of change before, during and after COVID19 lockdown periods for women (N=1,246)**

|                          | Period          | Initial value (cm or %) | Final value (cm or %) | Delta (cm or %)   | Pvalue* |
|--------------------------|-----------------|-------------------------|-----------------------|-------------------|---------|
| Waist circumference (cm) | Before Lockdown | 100 [91 ; 108]          | 98 [90 ; 107]         | -1 [-2 ; 0]       | <.01    |
|                          | Lockdown        | 98 [90 ; 107]           | 96 [88 ; 104]         | -2 [-6 ; 0]       | <.01    |
|                          | After lockdown  | 96 [88 ; 104]           | 95 [88 ; 103]         | 0 [-1 ; 0]        | <.01    |
| Fat mass (%)             | Before Lockdown | 41.5 [38.2 ; 45.0]      | 41.1 [37.8 ; 44.7]    | -0.4 [-0.7 ; 0.0] | <.01    |
|                          | Lockdown        | 41.1 [37.8 ; 44.7]      | 40.0 [36.5 ; 43.7]    | -0.9 [-2.3 ; 0.2] | <.01    |
|                          | After lockdown  | 40.0 [36.5 ; 43.7]      | 39.8 [36.2 ; 43.5]    | -0.2 [-0.5 ; 0.2] | <.01    |
| Muscle mass (%)          | Before Lockdown | 28.9 [26.8 ; 31.2]      | 29.0 [27.0 ; 31.3]    | 0.1 [0.0 ; 0.2]   | <.01    |
|                          | Lockdown        | 29.0 [27.0 ; 31.3]      | 29.2 [27.3 ; 31.7]    | 0.2 [-0.1 ; 0.6]  | <.01    |
|                          | After lockdown  | 29.2 [27.3 ; 31.7]      | 29.2 [27.4 ; 31.7]    | 0.0 [-0.1 ; 0.1]  | <.01    |
| Body water (%)           | Before Lockdown | 42.5 [39.9 ; 45.0]      | 42.7 [40.1 ; 45.4]    | 0.2 [0.0 ; 0.5]   | <.01    |
|                          | Lockdown        | 42.7 [40.1 ; 45.4]      | 43.5 [40.7 ; 46.1]    | 0.6 [-0.2 ; 1.6]  | <.01    |
|                          | After lockdown  | 43.5 [40.7 ; 46.1]      | 43.6 [40.9 ; 46.3]    | 0.1 [-0.1 ; 0.4]  | <.01    |

Values are presented in median and interquartile range.

\*All p values were results of paired t-test comparing initial and final weights

**eTable 3: Description of changes in body composition and rate of change before, during and after COVID19 lockdown periods for men (N=304)**

|                          | Period          | Initial value (cm or %) | Final value (cm or %) | Delta (cm or %)   | Pvalue* |
|--------------------------|-----------------|-------------------------|-----------------------|-------------------|---------|
| Waist circumference (cm) | Before Lockdown | 100 [91 ; 108]          | 98 [90 ; 107]         | -1 [-2 ; 0]       | <.01    |
|                          | Lockdown        | 98 [90 ; 107]           | 96 [88 ; 104]         | -2 [-6 ; 0]       | <.01    |
|                          | After lockdown  | 96 [88 ; 104]           | 95 [88 ; 103]         | 0 [-1 ; 0]        | <.01    |
| Fat mass (%)             | Before Lockdown | 36.3 [33.1 ; 40.6]      | 36.0 [32.7 ; 40.1]    | -0.3 [-0.8 ; 0.0] | <.01    |
|                          | Lockdown        | 36.0 [32.7 ; 40.1]      | 35.2 [31.2 ; 38.5]    | -0.8 [-2.3 ; 0.2] | <.01    |
|                          | After lockdown  | 35.2 [31.2 ; 38.5]      | 34.9 [31.1 ; 38.3]    | -0.2 [-0.6 ; 0.1] | <.01    |
| Muscle mass (%)          | Before Lockdown | 34.5 [31.2 ; 36.5]      | 34.6 [31.4 ; 36.8]    | 0.2 [0.0 ; 0.4]   | <.01    |
|                          | Lockdown        | 34.6 [31.4 ; 36.8]      | 35.1 [32.3 ; 37.3]    | 0.4 [-0.1 ; 1.3]  | <.01    |
|                          | After lockdown  | 35.1 [32.3 ; 37.3]      | 35.1 [32.3 ; 37.5]    | 0.1 [-0.1 ; 0.3]  | <.01    |
| Body water (%)           | Before Lockdown | 46.2 [43.4 ; 48.8]      | 46.6 [43.7 ; 49.0]    | 0.2 [0.0 ; 0.5]   | <.01    |
|                          | Lockdown        | 46.6 [43.7 ; 49.0]      | 47.1 [44.6 ; 49.8]    | 0.6 [-0.2 ; 1.7]  | <.01    |
|                          | After lockdown  | 47.1 [44.6 ; 49.8]      | 47.2 [44.9 ; 49.8]    | 0.1 [-0.1 ; 0.4]  | <.01    |

Values are presented in median and interquartile range.

\*All p values were results of paired t-test comparing initial and final weights

**Table 4: Comparison of weight loss and rate of weight loss according to participation in remote consultation follow-up**

| Variables                              | No remote consultation<br>(N=265) | Remote consultation<br>(N=1,285) | Missing values<br>(N) | Pvalue |
|----------------------------------------|-----------------------------------|----------------------------------|-----------------------|--------|
| <b>Before lockdown</b>                 |                                   |                                  |                       |        |
| Delta weight loss (kg)                 | -1.0 [-1.7 ; -0.2]                | -1.2 [-2.1 ; -0.3]               | 0                     | 0.01   |
| Delta weight loss (%)                  | -1.1 [-2 ; -0.2]                  | -1.3 [-2.3 ; -0.4]               | 0                     | 0.02   |
| Rate of weight loss (kg/week)          | -0.4 [-0.8 ; -0.1]                | -0.6 [-1 ; -0.2]                 | 6                     | <.01   |
| <b>During lockdown</b>                 |                                   |                                  |                       |        |
| Delta weight loss during lockdown (kg) | -0.7 [-3.8 ; 1.6]                 | -2.9 [-6.7 ; 0.2]                | 0                     | <.01   |
| Delta weight loss during lockdown (%)  | -0.8 [-4.5 ; 2.1]                 | -3.4 [-7.6 ; 0.2]                | 0                     | <.01   |
| Rate of weight loss (kg/week)          | -0.1 [-0.1 ; 0]                   | -0.1 [-0.1 ; 0]                  | 0                     | 0.05   |
| <b>After lockdown</b>                  |                                   |                                  |                       |        |
| Delta weight loss (kg)                 | -0.4 [-1 ; 0.3]                   | -0.5 [-1.2 ; 0.2]                | 0                     | 0.02   |
| Delta weight loss (%)                  | -0.4 [-1.1 ; 0.5]                 | -0.6 [-1.5 ; 0.2]                | 0                     | <.01   |
| Rate of weight loss (kg/week)          | -0.2 [-0.4 ; 0.2]                 | -0.2 [-0.6 ; 0.1]                | 6                     | <.01   |

Median period durations between two measures: before lockdown: 15 days [15; 17], during LD: 99 days [92; 106], after LD: 15 days [15; 21].

eFigure 1: Rates of change in body composition before, during and after COVID19 lockdown

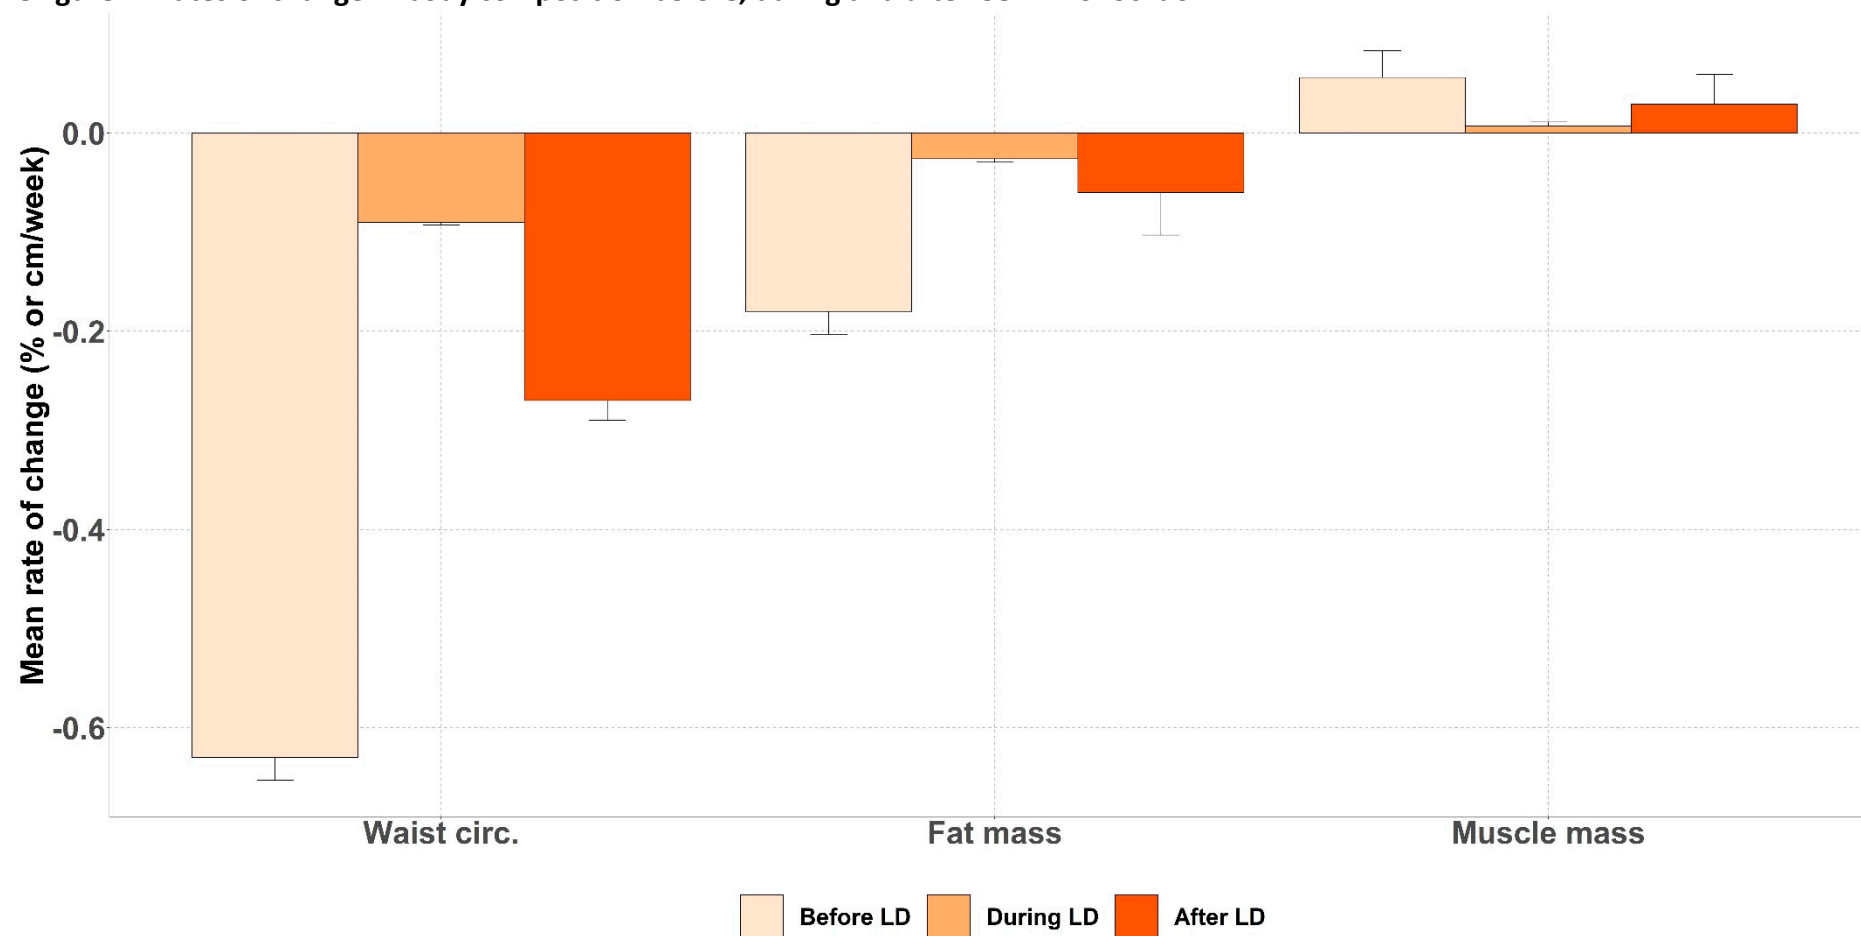

LD: lockdown; Waist circ.: waist circumference
